# Supplementary material for: The Relationship between Nutrient Patterns and Bone Mineral Density in Postmenopausal Women
Source: PubMed Central journal article supplement (PMC6628050; doi:10.3390/nu11061262), 2019-06-03
Supplement: nutrients-11-01262-s001.pdf [file nutrients-11-01262-s001.pdf]

Consumption patterns of selected nutrients across quartiles of nutrient patterns give a description of the nutrient patterns with Q1 being the lowest quartile and Q4 the highest quartile (Table S1)

**Table S1: Mean (SD) of selected nutrient intake across quartiles of nutrient pattern scores (n=101)**

| Nutrients           | NP1             |                 |                 |                 | P-value | NP2             |                 |                 |                 | P-value |
|---------------------|-----------------|-----------------|-----------------|-----------------|---------|-----------------|-----------------|-----------------|-----------------|---------|
|                     | Q1              | Q2              | Q3              | Q4              |         | Q1              | Q2              | Q3              | Q4              |         |
| Protein (g)         | 68.9 (18.0)     | 81.4 (16.7)     | 94.0 (13.6)     | 97.8 (24.3)     | <0.001  | 83.9 (21.8)     | 82.4 (24.6)     | 89.7 (22.6)     | 86.5 (16.7)     | 0.651   |
| Total fat (g)       | 70.3 (16.3)     | 77.7 (30.1)     | 87.1 (16.0)     | 82.6 (22.4)     | 0.049   | 71.3 (20.2)     | 71.3 (22.3)     | 85.8 (22.3)     | 89.8 (19.6)     | 0.002   |
| Carbohydrate (g)    | 136.0 (35.3)    | 166.2 (47.7)    | 203.5 (40.5)    | 262.1 (53.1)    | <0.001  | 195.1 (61.5)    | 190.8 (68.1)    | 194.9 (71.6)    | 187.4 (59.2)    | 0.971   |
| Vitamin D (µg)      | 7.1 (9.2)       | 5.4 (4.6)       | 6.9 (7.0)       | 5.7 (3.8)       | 0.703   | 3.3 (2.1)       | 5.3 (3.9)       | 5.2 (3.6)       | 11.4 (10.1)     | <0.001  |
| Calcium (mg)        | 652.5 (193.5)   | 809.1 (184.6)   | 940.1 (248.2)   | 1315.0 (388.5)  | <0.001  | 985.0 (404.1)   | 871.5 (321.7)   | 945.2 (404.8)   | 917.8 (307.3)   | 0.723   |
| Magnesium (mg)      | 290.9 (54.5)    | 322.2 (67.3)    | 411.7 (76.7)    | 462.2 (80.2)    | <0.001  | 321.5 (84.4)    | 335.5 (93.8)    | 389.1 (82.7)    | 444.2 (81.8)    | <0.001  |
| Phosphorus (mg)     | 1177.0 (224.2)  | 1345.4 (236.8)  | 1624.0 (180.2)  | 1931.1 (359.7)  | <0.001  | 1504.0 (472.7)  | 1420.3 (382.1)  | 1569.0 (370.1)  | 1592.2 (283.2)  | 0.381   |
| Potassium (mg)      | 2787.1 (456.2)  | 3216.8 (479.5)  | 3896.6 (770.7)  | 4542.8 (842.4)  | <0.001  | 3359.0 (849.8)  | 3424.5 (859.8)  | 3748.4 (901.4)  | 3930.2 (1045.9) | 0.095   |
| Total omega 3       | 1.5 (0.9)       | 1.5 (1.2)       | 1.4 (0.9)       | 1.5 (1.2)       | 0.989   | 0.8 (0.4)       | 1.0 (0.5)       | 1.7 (1.3)       | 2.2 (1.1)       | <0.001  |
| Total omega 6       | 5.9 (2.6)       | 7.9 (6.4)       | 7.5 (3.5)       | 6.9 (2.9)       | 0.340   | 4.8 (1.9)       | 5.5 (2.2)       | 7.6 (3.0)       | 10.3 (5.9)      | <0.001  |
| Beta-carotene (µg)  | 2214.0 (1659.4) | 1954.0 (1705.2) | 2970.5 (1532.3) | 3057.2 (2366.4) | 0.089   | 1529.0 (783.7)  | 2107.6 (1388.8) | 2520.0 (1649.7) | 4073.6 (2364.8) | <0.001  |
| Alpha-carotene (µg) | 294.9 (336.0)   | 312.9 (661.1)   | 640.0 (506.7)   | 692.5 (716.8)   | 0.021   | 230.2 (259.8)   | 408.2 (435.6)   | 409.7 (584.0)   | 901.5 (777.1)   | <0.001  |
| Biotin (µg)         | 8.2 (5.8)       | 5.6 (3.4)       | 13.1 (13.3)     | 10.8 (15.1)     | 0.073   | 6.4 (5.6)       | 8.8 (9.5)       | 11.2 (14.4)     | 11.5 (11.8)     | 0.302   |
| Vitamin C (mg)      | 82.1 (32.5)     | 125.9 (80.2)    | 135.3 (70.1)    | 128.7 (74.8)    | 0.024   | 104.1 (55.6)    | 102.4 (48.2)    | 141.6 (97.6)    | 125.2 (62.6)    | 0.139   |
| Vitamin B12         | 3.5 (2.2)       | 3.5 (1.3)       | 3.6 (1.1)       | 6.4 (6.7)       | 0.012   | 3.5 (1.5)       | 3.9 (1.8)       | 4.9 (4.4)       | 4.7 (5.8)       | 0.490   |
| Saturated fat       | 25.6 (8.1)      | 29.9 (13.5)     | 31.3 (7.6)      | 35.2 (15.0)     | 0.035   | 32.7 (13.6)     | 28.4 (11.1)     | 32.6 (12.8)     | 28.5 (9.4)      | 0.368   |
| Cholesterol (mg)    | 296.2 (157.6)   | 299.4 (165.2)   | 313.3 (129.3)   | 270.3 (135.7)   | 0.771   | 266.6 (95.7)    | 292.8 (160.0)   | 355.3 (163.5)   | 265.2 (144.4)   | 0.098   |
| Dietary fibre (g)   | 21.1 (4.5)      | 22.6 (5.3)      | 29.5 (8.4)      | 35.4 (8.9)      | <0.001  | 23.8 (8.7)      | 23.7 (6.0)      | 27.5 (7.4)      | 33.9 (9.8)      | <0.001  |
| Energy kJ           | 6529.2 (813.1)  | 7548.5 (1626.7) | 8818.1 (945.5)  | 9515.0 (1632.7) | <0.001  | 7797.6 (1733.7) | 7791.4 (1973.9) | 8414.5 (1713.8) | 8448.4 (1416.0) | 0.333   |
| MET-minutes         | 310.2 (359.4)   | 252.1 (216.9)   | 292.6 (245.9)   | 800.5 (1433.2)  | 0.036   | 438.8 (699.5)   | 533.9 (1233.6)  | 333.7 (553.1)   | 339.4 (307.0)   | 0.771   |

One-way ANOVA was used to test the difference across the quartiles.

**Table S1: Mean (SD) of selected nutrient intake across quartiles of nutrient pattern scores (n=101) contd.**

| Nutrients           | NP3             |                 |                 |                 | P-value |
|---------------------|-----------------|-----------------|-----------------|-----------------|---------|
|                     | Q1              | Q2              | Q3              | Q4              |         |
| Protein (g)         | 69.2 (16.5)     | 84.5 (18.4)     | 89.9 (18.3)     | 98.9 (21.9)     | <0.001  |
| Total fat (g)       | 59.5 (17.3)     | 71.4 (13.8)     | 82.0 (15.8)     | 105.3 (13.0)    | <0.001  |
| Carbohydrate (g)    | 182.4 (62.3)    | 194.9 (64.8)    | 179.8 (58.2)    | 210.9 (70.8)    | 0.305   |
| Vitamin D (µg)      | 4.8 (6.2)       | 6.2 (4.5)       | 8.7 (9.6)       | 5.4 (3.7)       | 0.163   |
| Calcium (mg)        | 887.4 (419.8)   | 971.3(318.4)    | 886.4 (321.9)   | 970.4 (379.2)   | 0.716   |
| Magnesium (mg)      | 343.8 (100.5)   | 376.5 (107.7)   | 355.7 (76.1)    | 412.7 (94.0)    | 0.064   |
| Phosphorus (mg)     | 1333.2 (410.8)  | 1532.9 (382.0)  | 1526.4 (294.1)  | 1688.6 (371.8)  | 0.011   |
| Potassium (mg)      | 3570.5 (1031.1) | 3692.8 (964.3)  | 3555.3 (826.0)  | 3632.8 (949.4)  | 0.952   |
| Total omega 3       | 1.3 (1.2)       | 1.2 (0.6)       | 1.6 (1.0)       | 1.6 (1.3)       | 0.452   |
| Total omega 6       | 6.6 (6.4)       | 6.6 (3.0)       | 6.8 (2.4)       | 8.2 (3.8)       | 0.441   |
| Beta-carotene (µg)  | 3512.5 (2584.7) | 2614.4 (1959.0) | 2405.6 (1244.5) | 1677.4 (801.7)  | 0.005   |
| Alpha-carotene (µg) | 779.1 (864.1)   | 524.8 (563.9)   | 407.1 (393.7)   | 233.8 (271.9)   | 0.009   |
| Biotin (µg)         | 5.2 (3.2)       | 7.0 (4.7)       | 8.2 (6.4)       | 17.5 (17.9)     | <0.001  |
| Vitamin C (mg)      | 151.4 (88.3)    | 115.7 (71.9)    | 103.4 (49.6)    | 102.3 (52.6)    | 0.039   |
| Vitamin B12         | 4.8 (6.9)       | 3.9 (1.7)       | 3.6 (1.4)       | 4.7 (2.5)       | 0.613   |
| Saturated fat       | 20.4 (5.7)      | 27.9 (8.3)      | 32.4 (10.1)     | 41.5 (11.6)     | <0.001  |
| Cholesterol (mg)    | 194.6 (93.1)    | 245.4 (102.9)   | 353.7 (133.2)   | 388.1 (160.5)   | <0.001  |
| Dietary fibre (g)   | 28.9 (9.9)      | 27.7 (10.7)     | 25.1 (7.9)      | 26.9 (7.1)      | 0.509   |
| Energy kj           | 6973.7 (1425.0) | 7833.4 (1565.3) | 8125.4 (1363.3) | 9517.7 (1581.1) | <0.001  |
| MET-minutes         | 608.0 (1341.6)  | 365.1 (629.7)   | 326.4 (340.3)   | 353.0 (347.8)   | 0.549   |

One-way ANOVA was used to test the difference across the quartiles.
